# Supplementary material for: Open circuit voltage tuning through molecular design in hydrazone end capped donors for bulk heterojunction solar cells
Source: Royal Society of Chemistry journal article supplement (doi:10.1039/c2ta00673a), 2012-12-17

## Hydrazone end capped molecular donors for Bulk Heterojunction solar cells. Open Circuit Voltage tuning through molecular design.

Mauro Sassi,<sup>a</sup> Maurizio Crippa,<sup>a</sup> Riccardo Ruffo,<sup>a</sup> Riccardo Turrisi,<sup>a</sup> Martin Drees,<sup>b</sup> Upendra K. Pandey,<sup>c</sup> Roberto Termine,<sup>c</sup> Attilio Golemme,<sup>c</sup> Antonio Facchetti<sup>b</sup> and Luca Beverina<sup>a\*</sup>

<sup>a</sup> Department of Materials Science and INSTM, University of Milano-Bicocca, Via Cozzi 53, I-20125 Milano, Italy. <sup>b</sup> Polyera Corporation, 8045 Lamon Avenue, Suite 140, Skokie, IL 60077. <sup>c</sup> Centro di Eccellenza CEMIF.CAL, LASCAMM CR-INSTM, CNR-IPCF UOS CS - LiCryL, Dipartimento di Chimica, Università della Calabria, 87036 Rende, Italy.

Supporting information.

1. <sup>1</sup>H NMR of Derivative **1**
2. <sup>13</sup>C NMR of Derivative **1**
3. <sup>1</sup>H NMR of Derivative **2**
4. <sup>13</sup>C NMR of Derivative **2**
5. <sup>1</sup>H NMR of Derivative **3**
6. <sup>13</sup>C NMR of Derivative **3**
7. <sup>1</sup>H NMR of Derivative **5**
8. <sup>13</sup>C NMR of Derivative **5**
9. Table S1. Data for Solution-Processed Squaraine:PC<sub>71</sub>BM BHJ Photovoltaic Cells.
10. Figure S1. AFM images of representative devices made with derivatives 1-5 as the Donor compound.
11. Figure S2. DPV plots of derivatives 1-5.

### 1. <sup>1</sup>H NMR of Derivative **1** (500 MHz, CDCl<sub>3</sub>)

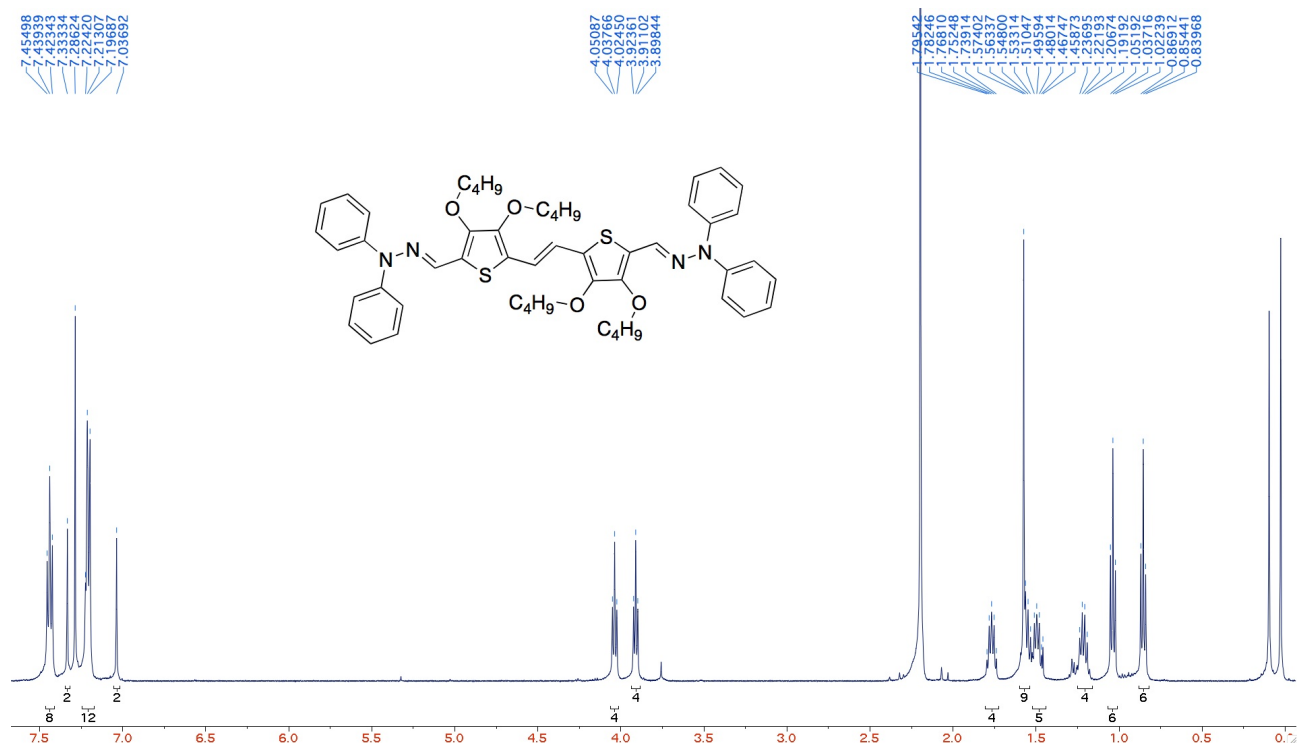

## 2. <sup>13</sup>C NMR of Derivative **1** (125.70 MHz, CDCl<sub>3</sub>)

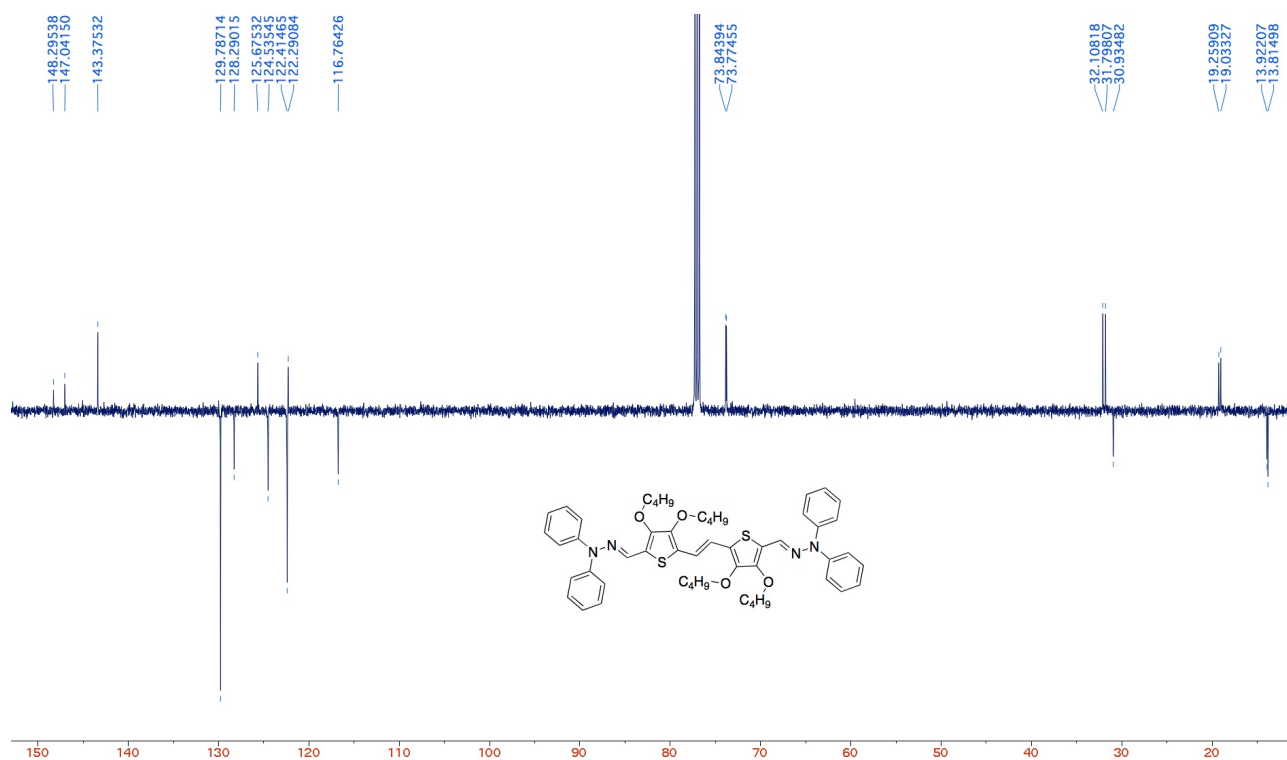

### 3. <sup>1</sup>H NMR of Derivative 2 (500 MHz, C<sub>6</sub>D<sub>6</sub>)

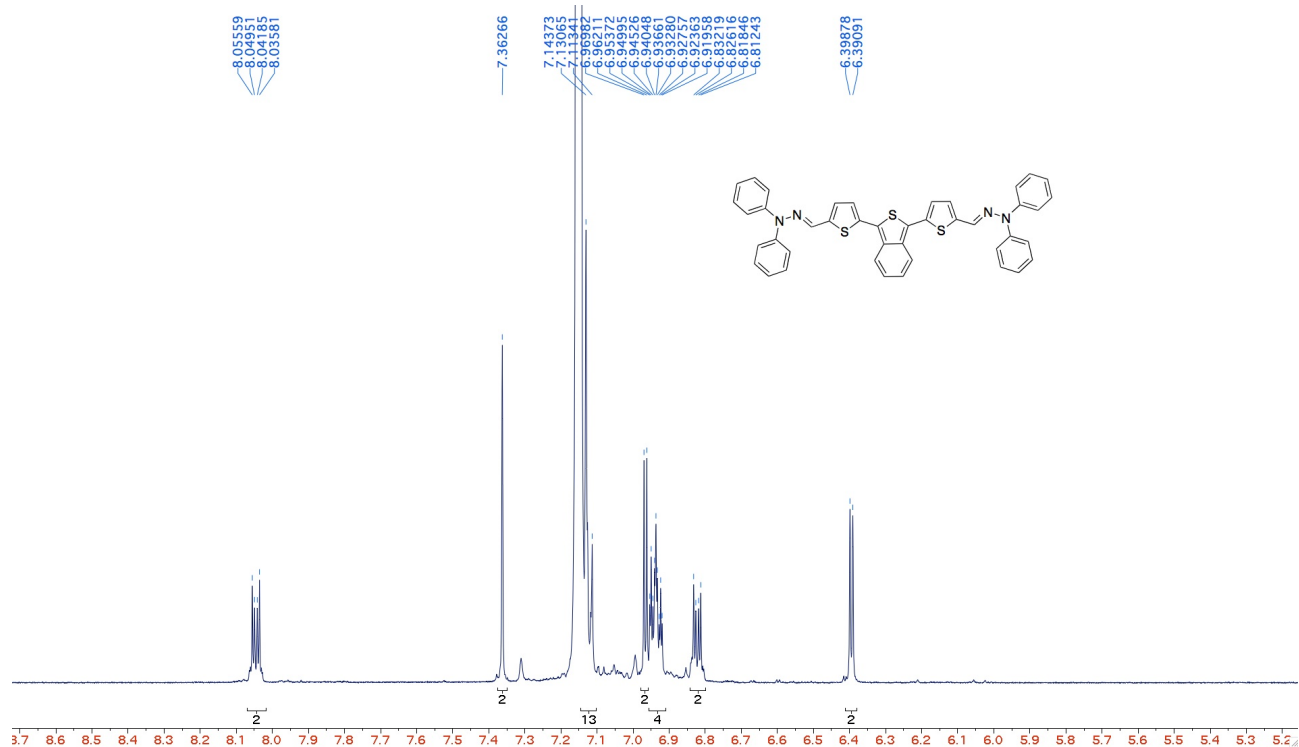

#### 4. $^{13}\text{C}$ NMR of Derivative 2 (125.70 MHz, $\text{C}_6\text{D}_6$ )

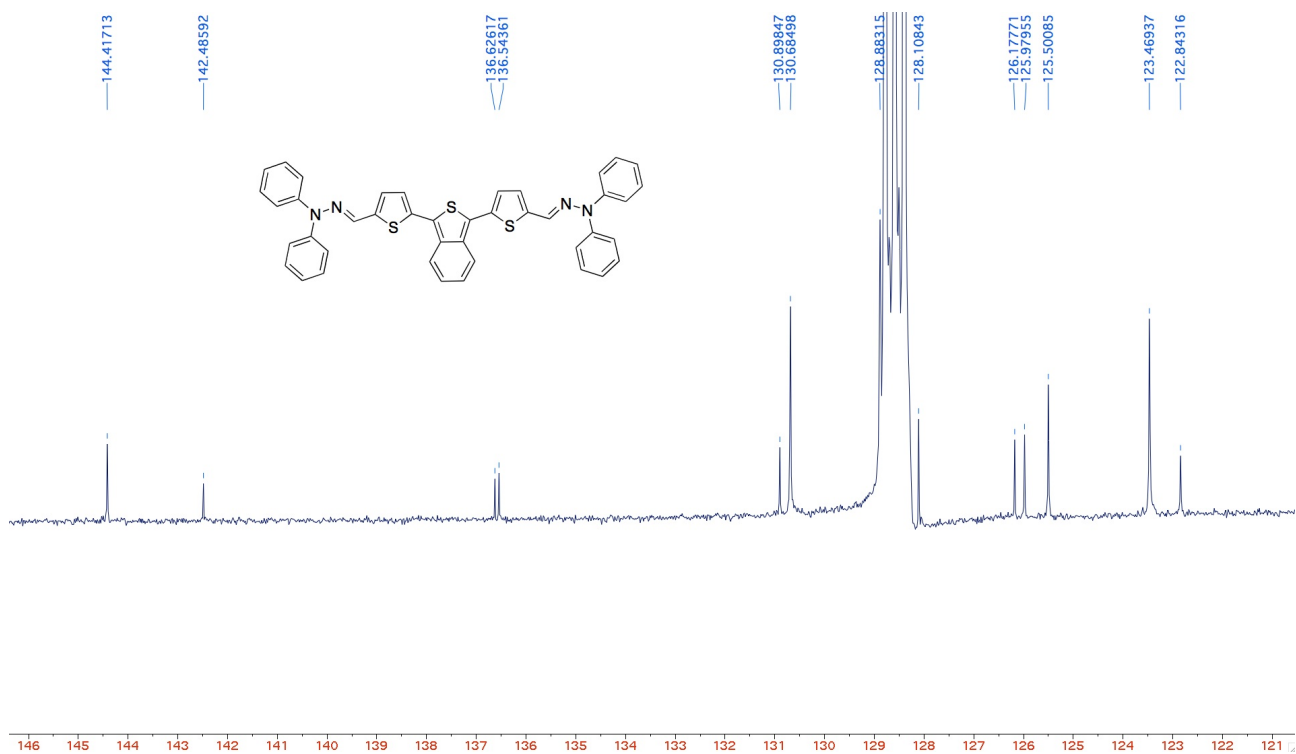

## 5. <sup>1</sup>H NMR of Derivative 3 (500 MHz, DMSO-d<sub>6</sub>)

Note that derivative 3 is not fully stable in DMSO, however the NMR spectra in CDCl<sub>3</sub>, CD<sub>2</sub>Cl<sub>2</sub> and C<sub>6</sub>D<sub>6</sub> are broad and without any interpretable splitting pattern due to aggregation.

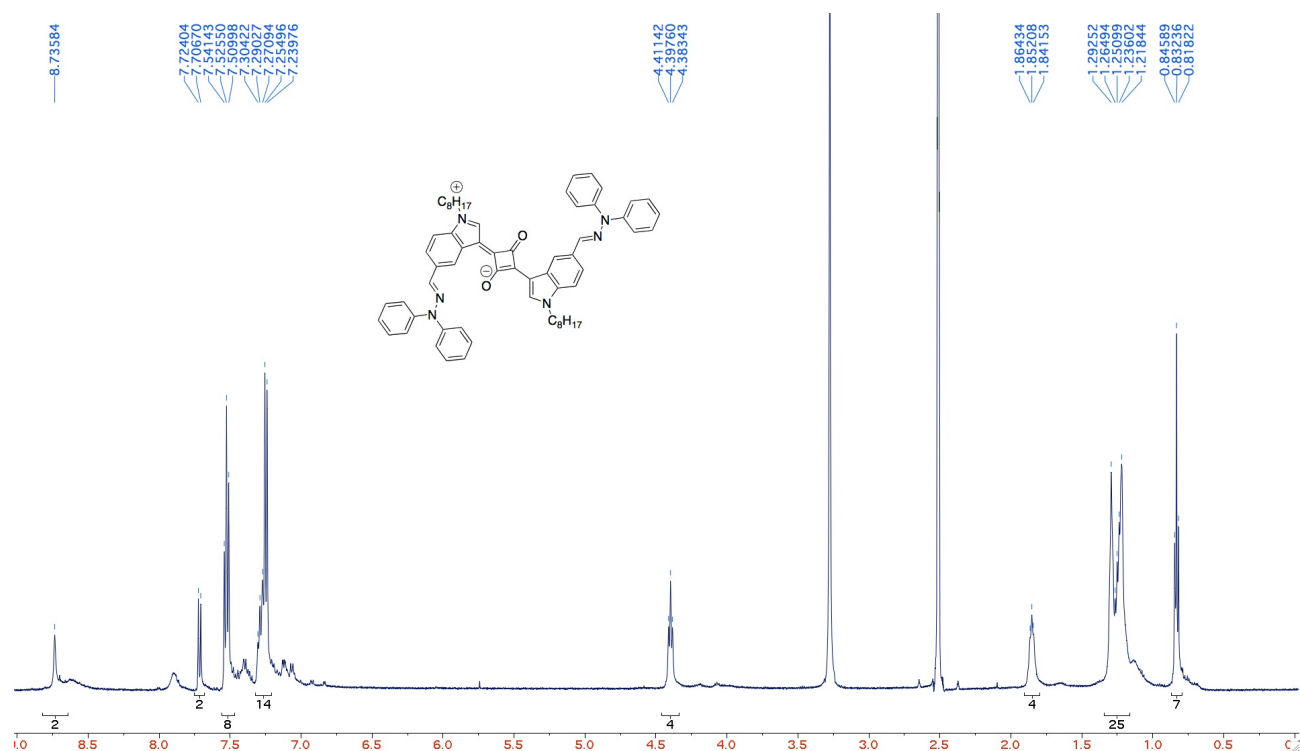

## 6. $^{13}\text{C}$ NMR of Derivative 3 (125.70 MHz, $\text{DMSO-d}_6$ )

Note that derivative 3 is not fully stable in DMSO, however the NMR spectra in  $\text{CDCl}_3$ ,  $\text{CD}_2\text{Cl}_2$  and  $\text{C}_6\text{D}_6$  are broad and without any interpretable splitting pattern due to aggregation.

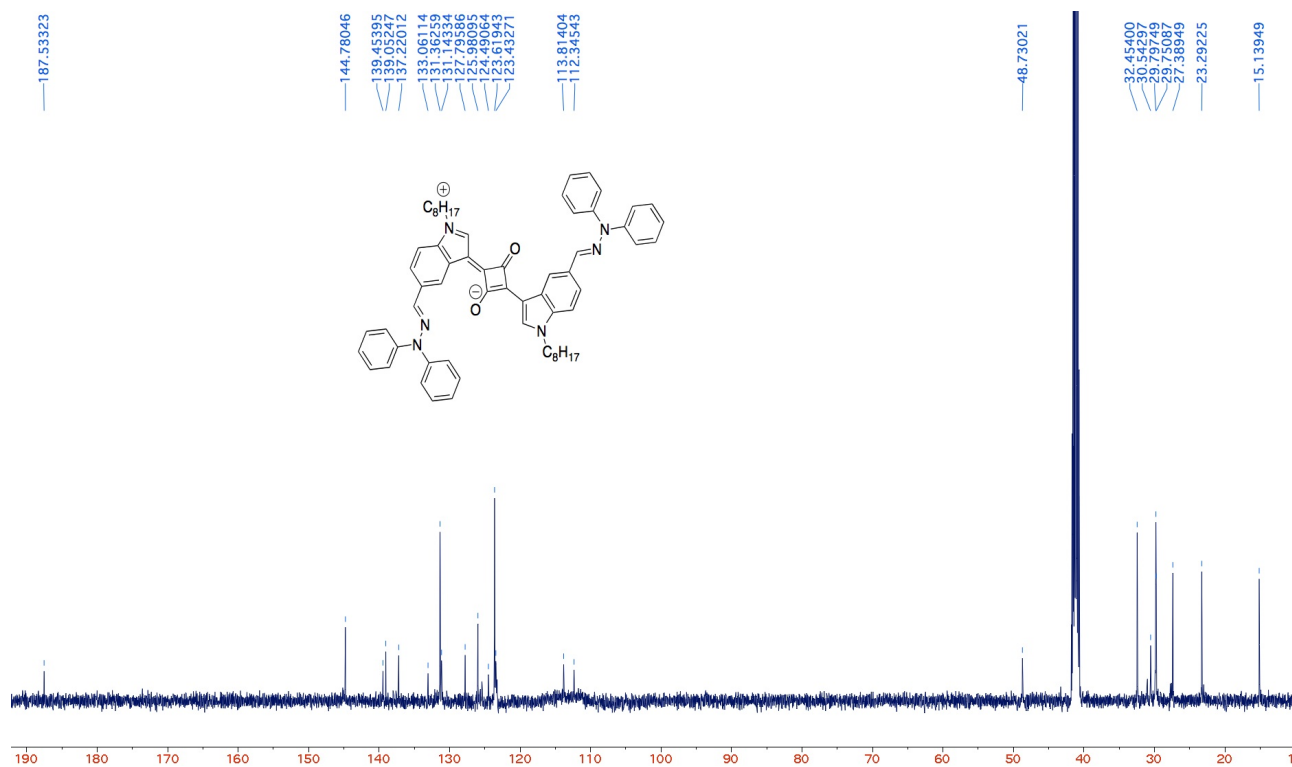

### 7. <sup>1</sup>H NMR of Derivative 5 (500 MHz, C<sub>6</sub>D<sub>6</sub>)

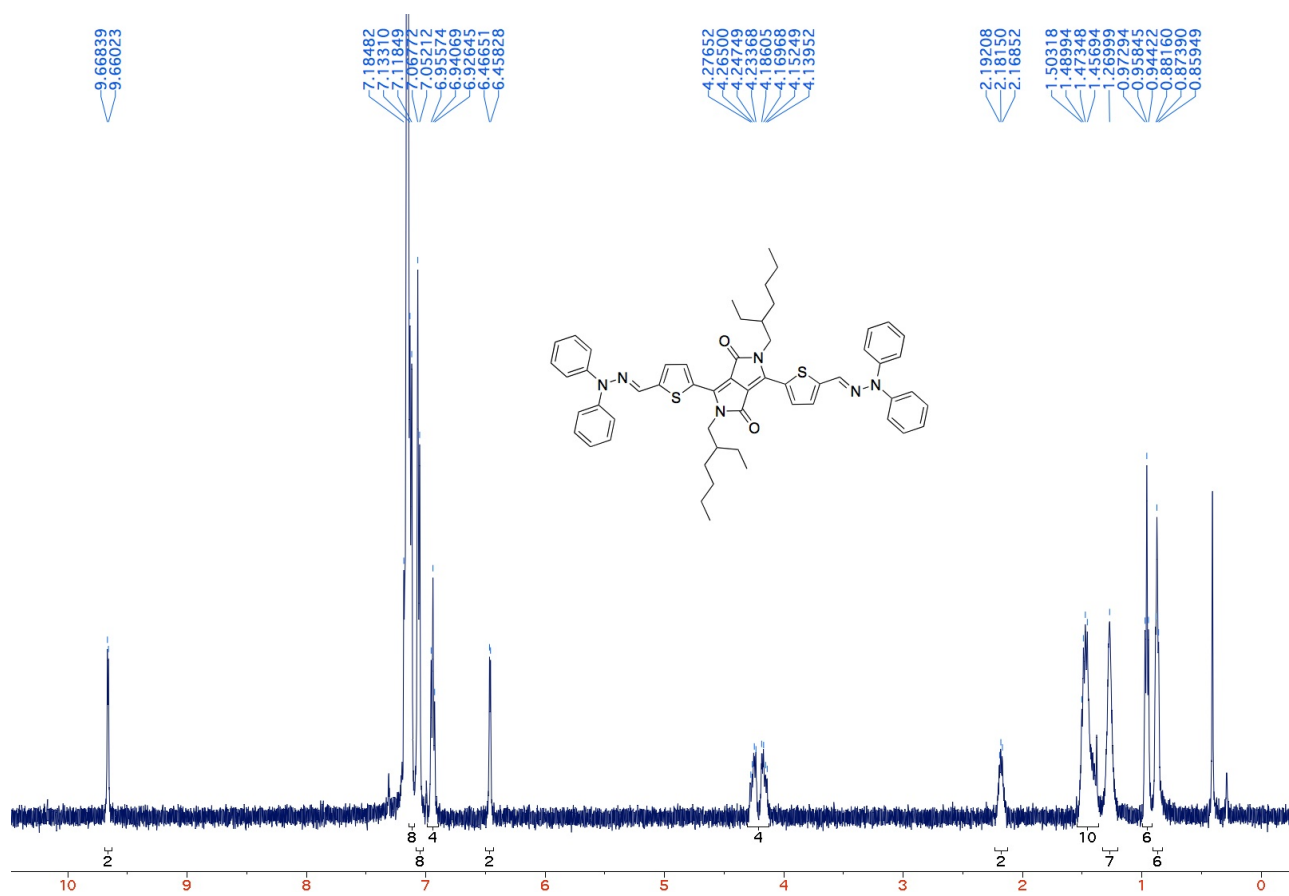



### 8. $^{13}\text{C}$ NMR of Derivative 5 (125.70 MHz, $\text{C}_6\text{D}_6$ ).

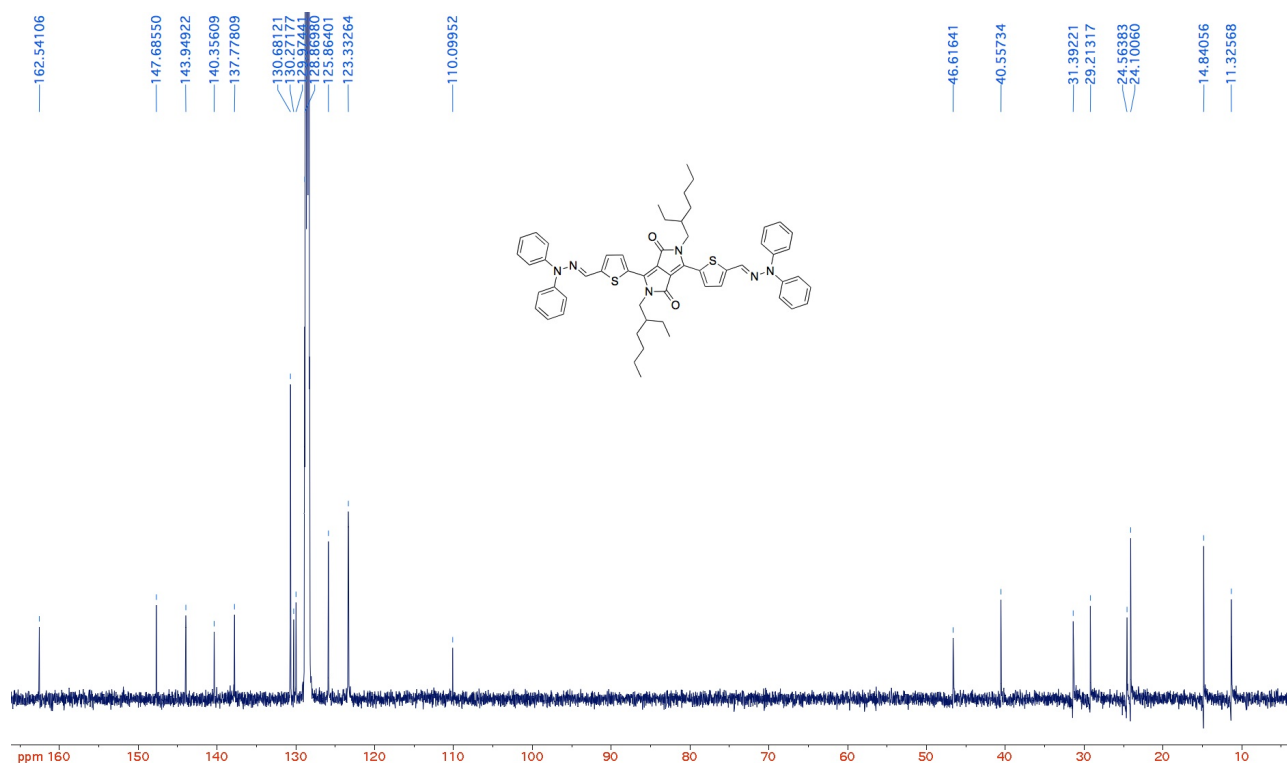

162.54106

147.68550

143.94922

140.35609

137.77809

130.68121

130.27177

128.86940

125.86401

123.33264

110.09952

46.61641

40.55734

31.39221

29.21317

24.56383

24.10060

14.84056

11.32568

9. Table S1. Data for Solution-Processed Hydrazones:PC<sub>71</sub>BM BHJ Photovoltaic Cells.

| <b>Blend</b>                         | <b>Active Layer (nm)</b> | <b>V<sub>oc</sub> (Volts)</b> | <b>I<sub>sc</sub> (mA/cm<sup>2</sup>)</b> | <b>Efficiency (η)</b> | <b>Fill Factor (FF)</b> | <b>Cathode Composition</b> |
|--------------------------------------|--------------------------|-------------------------------|-------------------------------------------|-----------------------|-------------------------|----------------------------|
| <b>1:PC<sub>61</sub>BM</b>           | 50                       | 0.54                          | 1.67                                      | 0.29                  | 0.32                    | LiF/Al                     |
| <b>1:PC<sub>71</sub>BM</b>           | 50                       | 0.57                          | 2.66                                      | 0.48                  | 0.32                    | LiF/Al                     |
| <b>1:PC<sub>71</sub>BM</b>           | 50                       | 0.62                          | 2.69                                      | 0.59                  | 0.35                    | Ca/Al                      |
| <b>2:PC<sub>71</sub>BM</b>           | 70                       | 0.58                          | 1.90                                      | 0.36                  | 0.33                    | Ca/Al                      |
| <b>(1:3)<br/>3:PC<sub>71</sub>BM</b> | 50                       | 0.68                          | 4.70                                      | 1.16                  | 0.36                    | LiF/Al                     |
| <b>(1:3)<br/>4:PC<sub>71</sub>BM</b> | 50                       | 0.56                          | 7.16                                      | 1.49                  | 0.37                    | LiF/Al                     |
| <b>(1:1)<br/>5:PC<sub>71</sub>BM</b> | 50                       | 0.77                          | 2.50                                      | 0.6                   | 0.30                    | LiF/Al                     |
| <b>(1:2)<br/>5:PC<sub>71</sub>BM</b> | 50                       | 0.74                          | 5.10                                      | 1.20                  | 0.33                    | LiF/Al                     |
| <b>(1:3)<br/>5:PC<sub>71</sub>BM</b> | 75                       | 0.71                          | 6.17                                      | 1.53                  | 0.35                    | LiF/Al                     |



10. Figure S1. AFM images of representative devices made with derivatives 1-5 as the Donor compound.

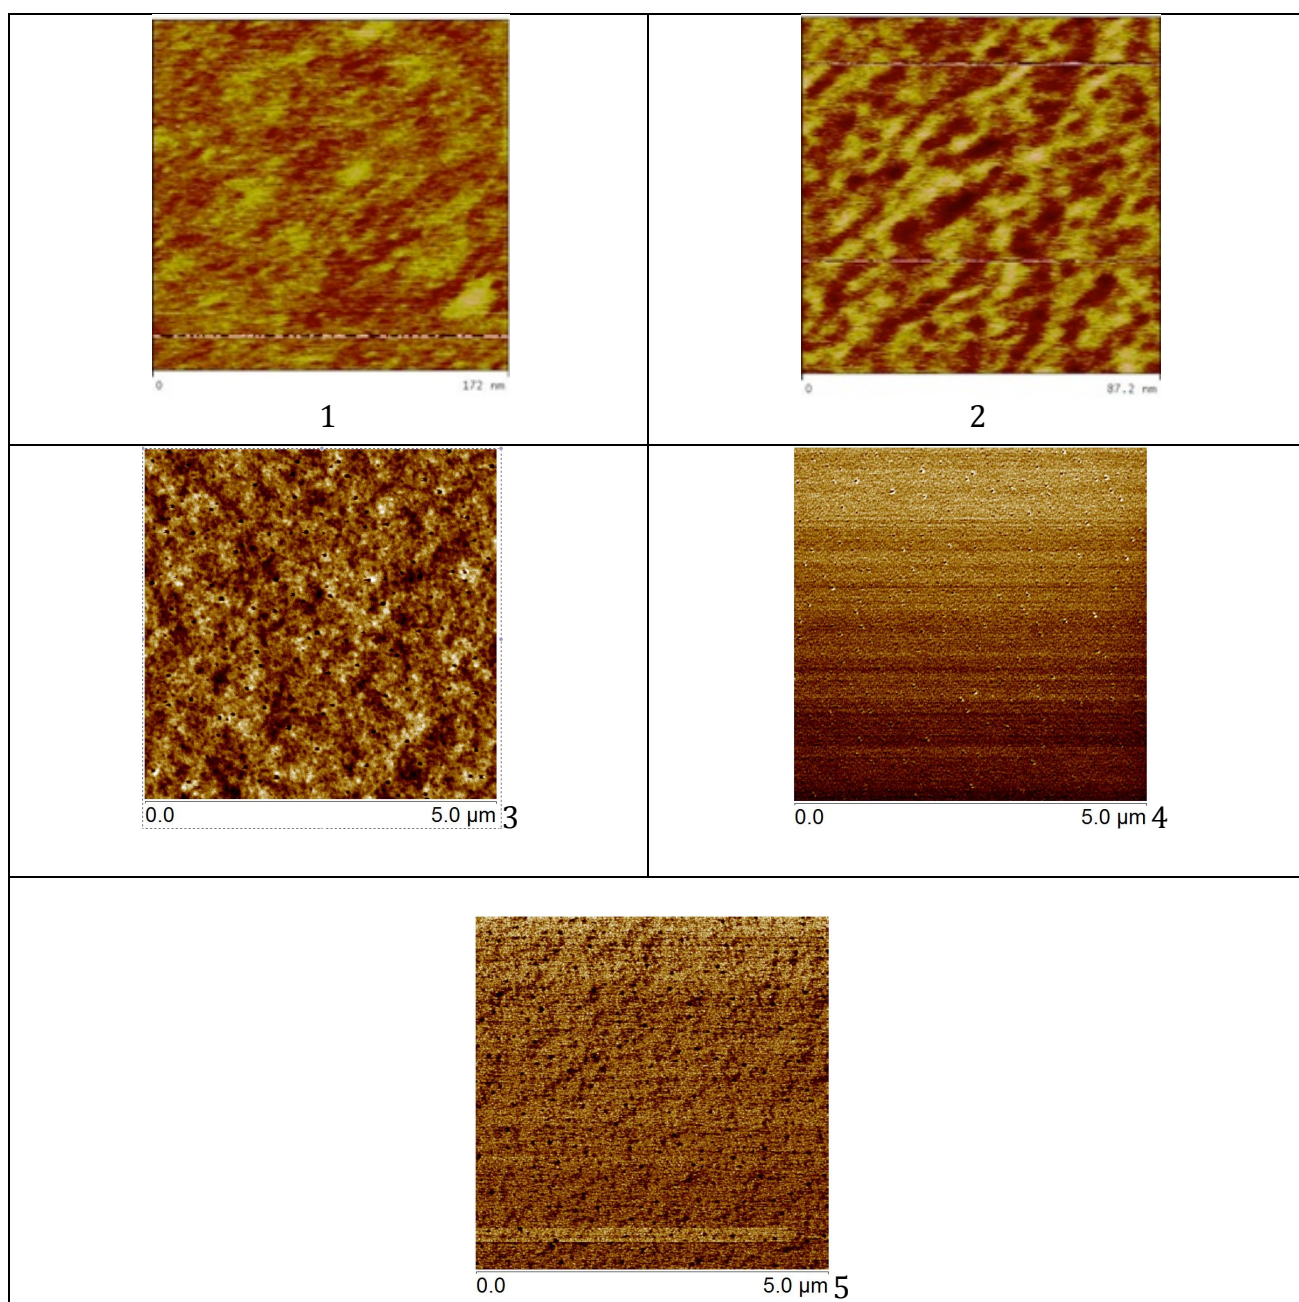

Figure S1. AFM images of the active layer of Derivatives **1-5** based OPV devices. Phase contrast.

11. Figure S2. DPV plots of derivatives **3** and **5**.

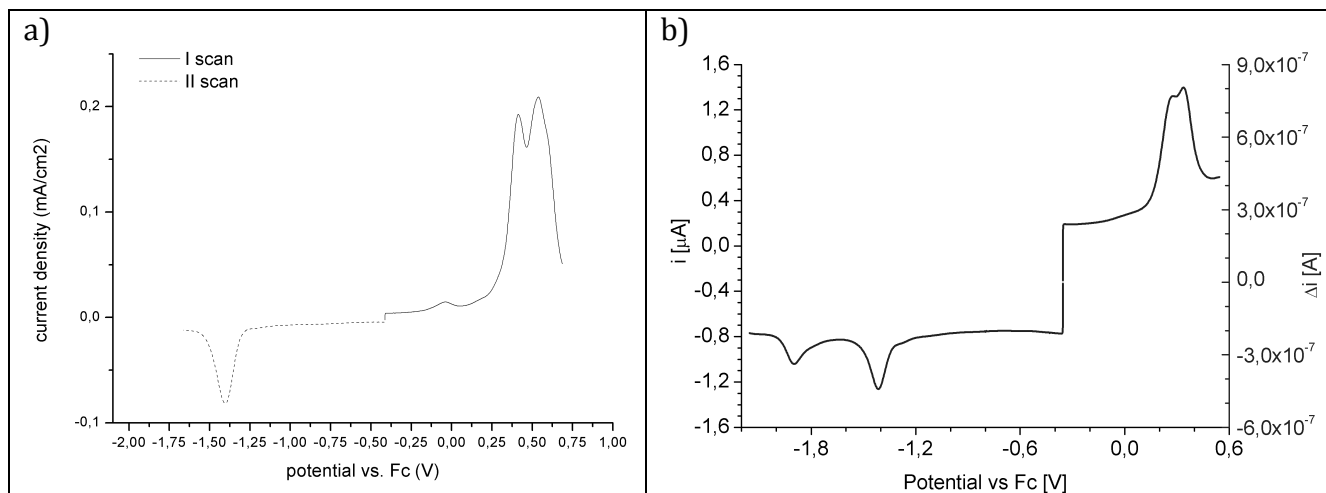

Supplement: c2ta00673a.pdf [file c2ta00673a.pdf]
